# Supplementary material for: Inhibitory Effects of Vaginal Lactobacilli on<em> Candida albicans </em>Growth, Hyphal Formation, Biofilm Development, and Epithelial Cell Adhesion
Source: Preprints.org preprint supplement (doi:10.20944/preprints202209.0424.v1), 2022-09-27
Supplement: Supplementary file 1 [file supplementary]

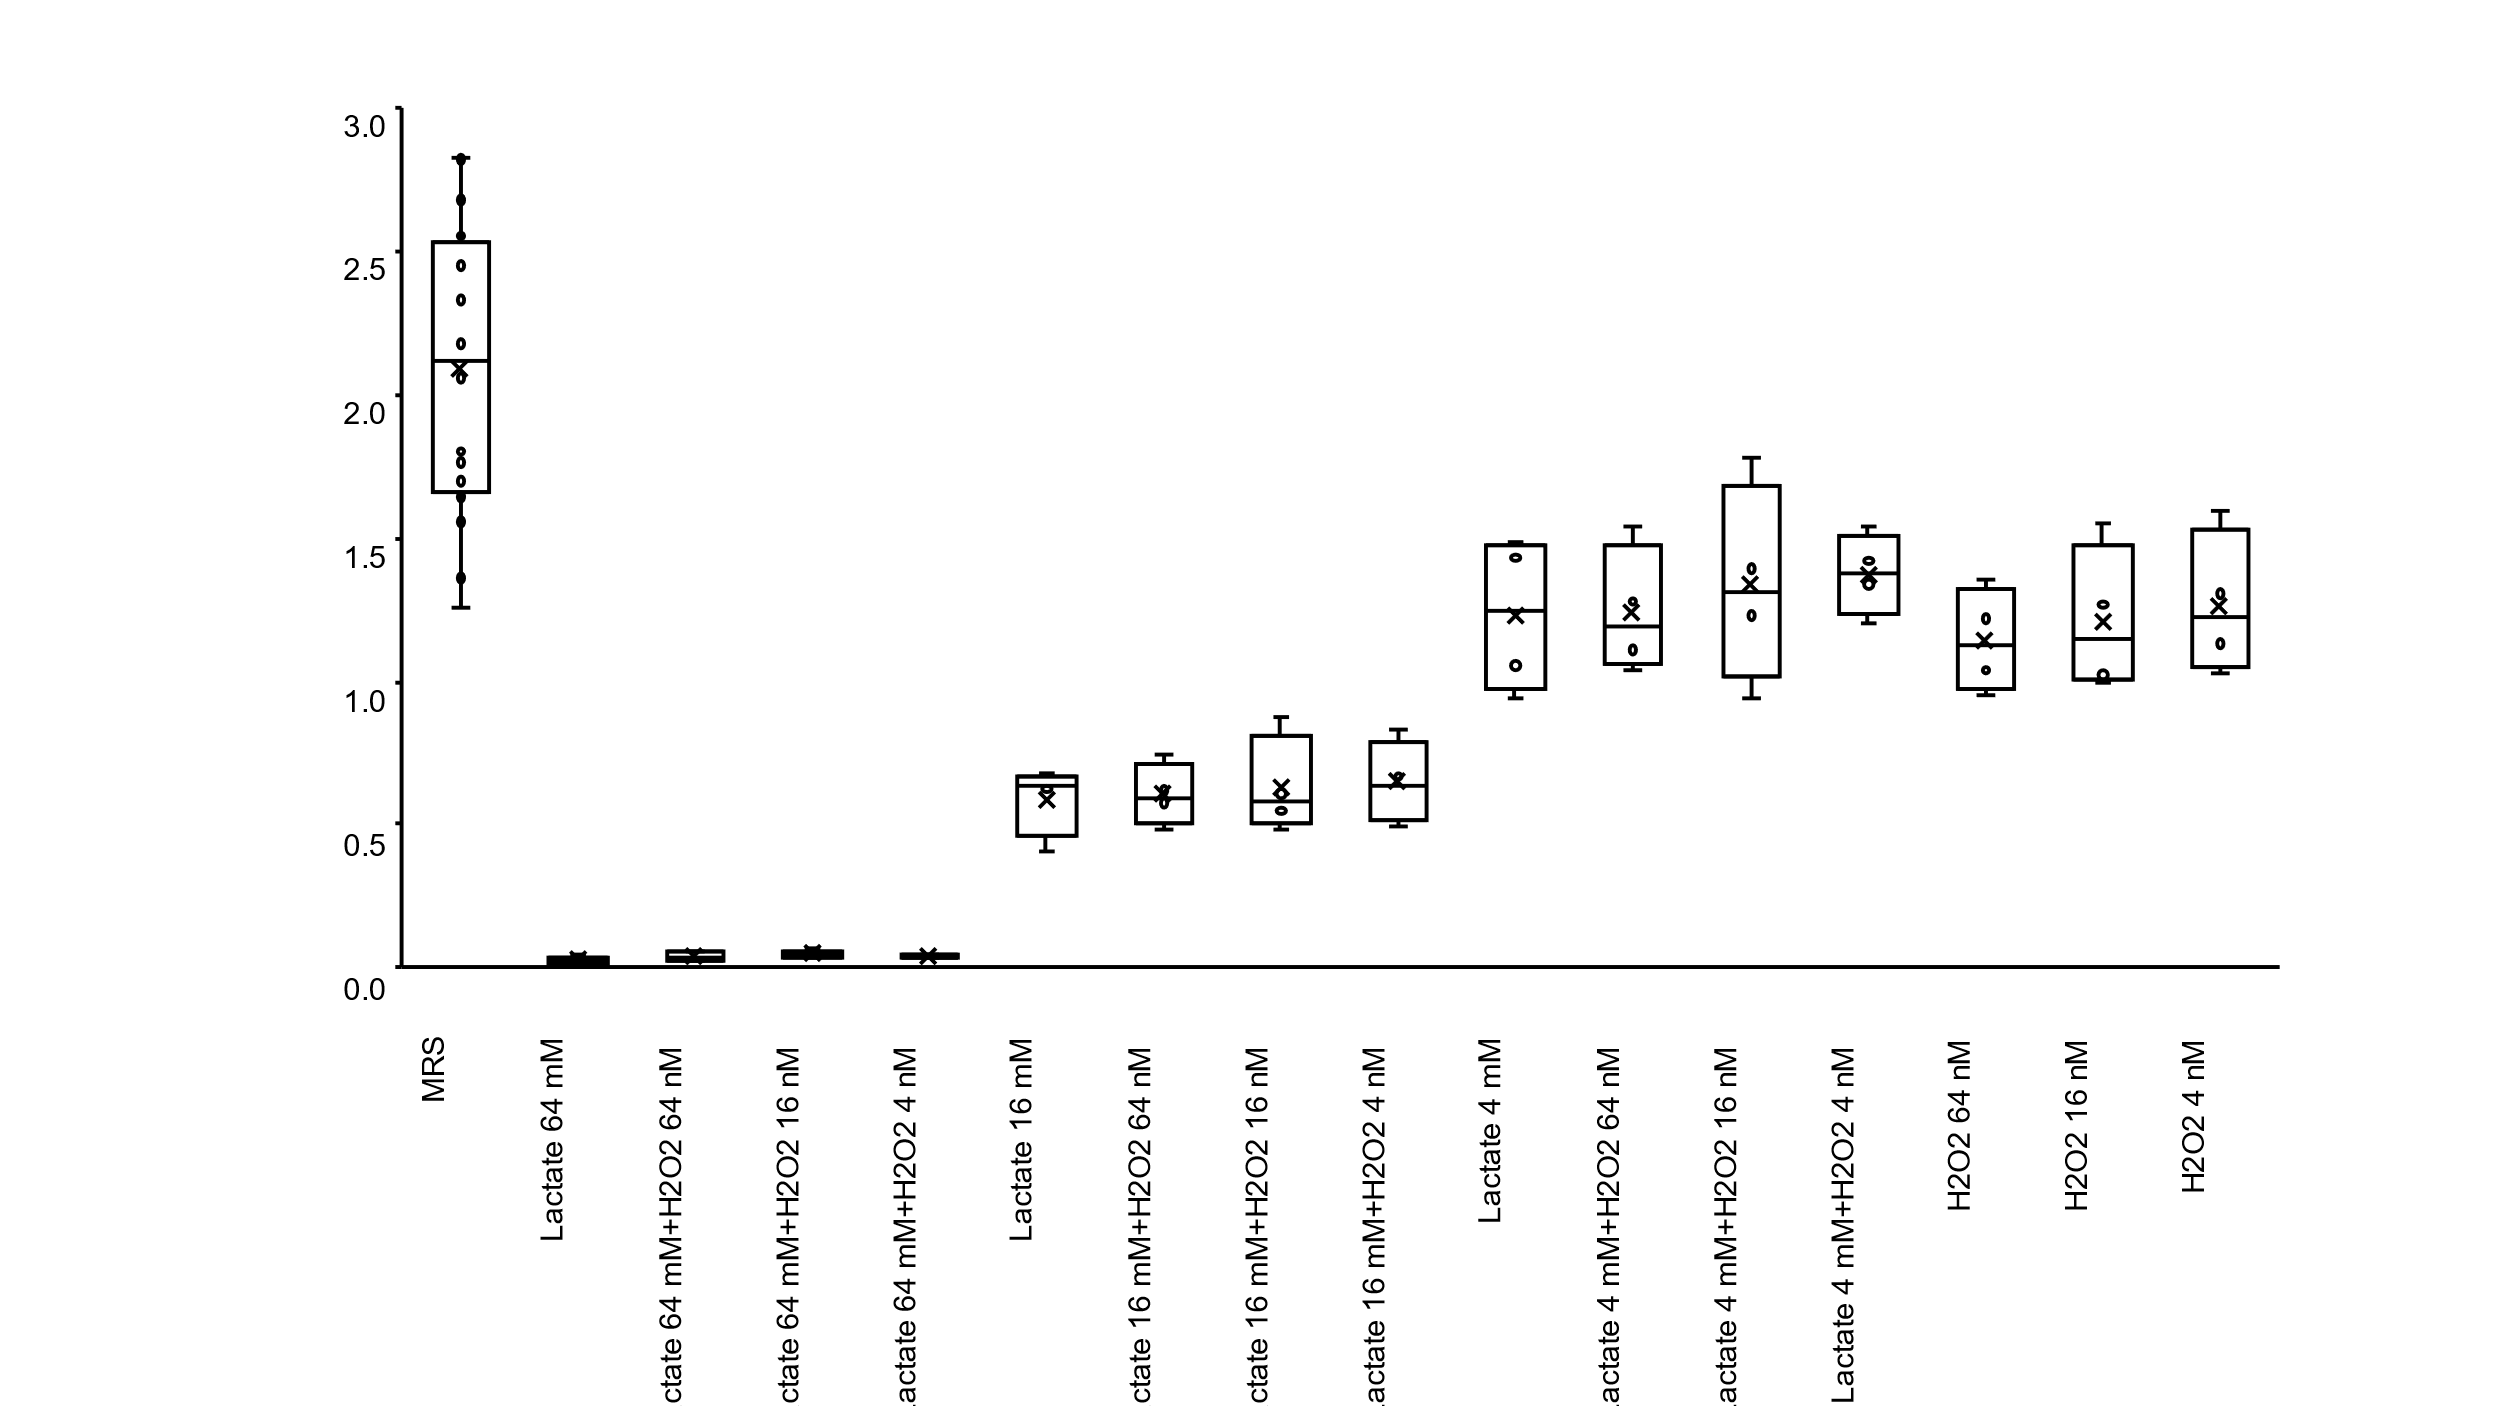


**Figure S1.** The biofilm formation of *C. albicans* HB-10 treated with lactate, hydrogen peroxide, or a combination of lactate and hydrogen peroxide

The biofilm formation of *C. albicans* HB-10 treated with lactate, hydrogen peroxide, or a combination of both, was used to measure WST-1 and was exhibited by the box whisker plots.


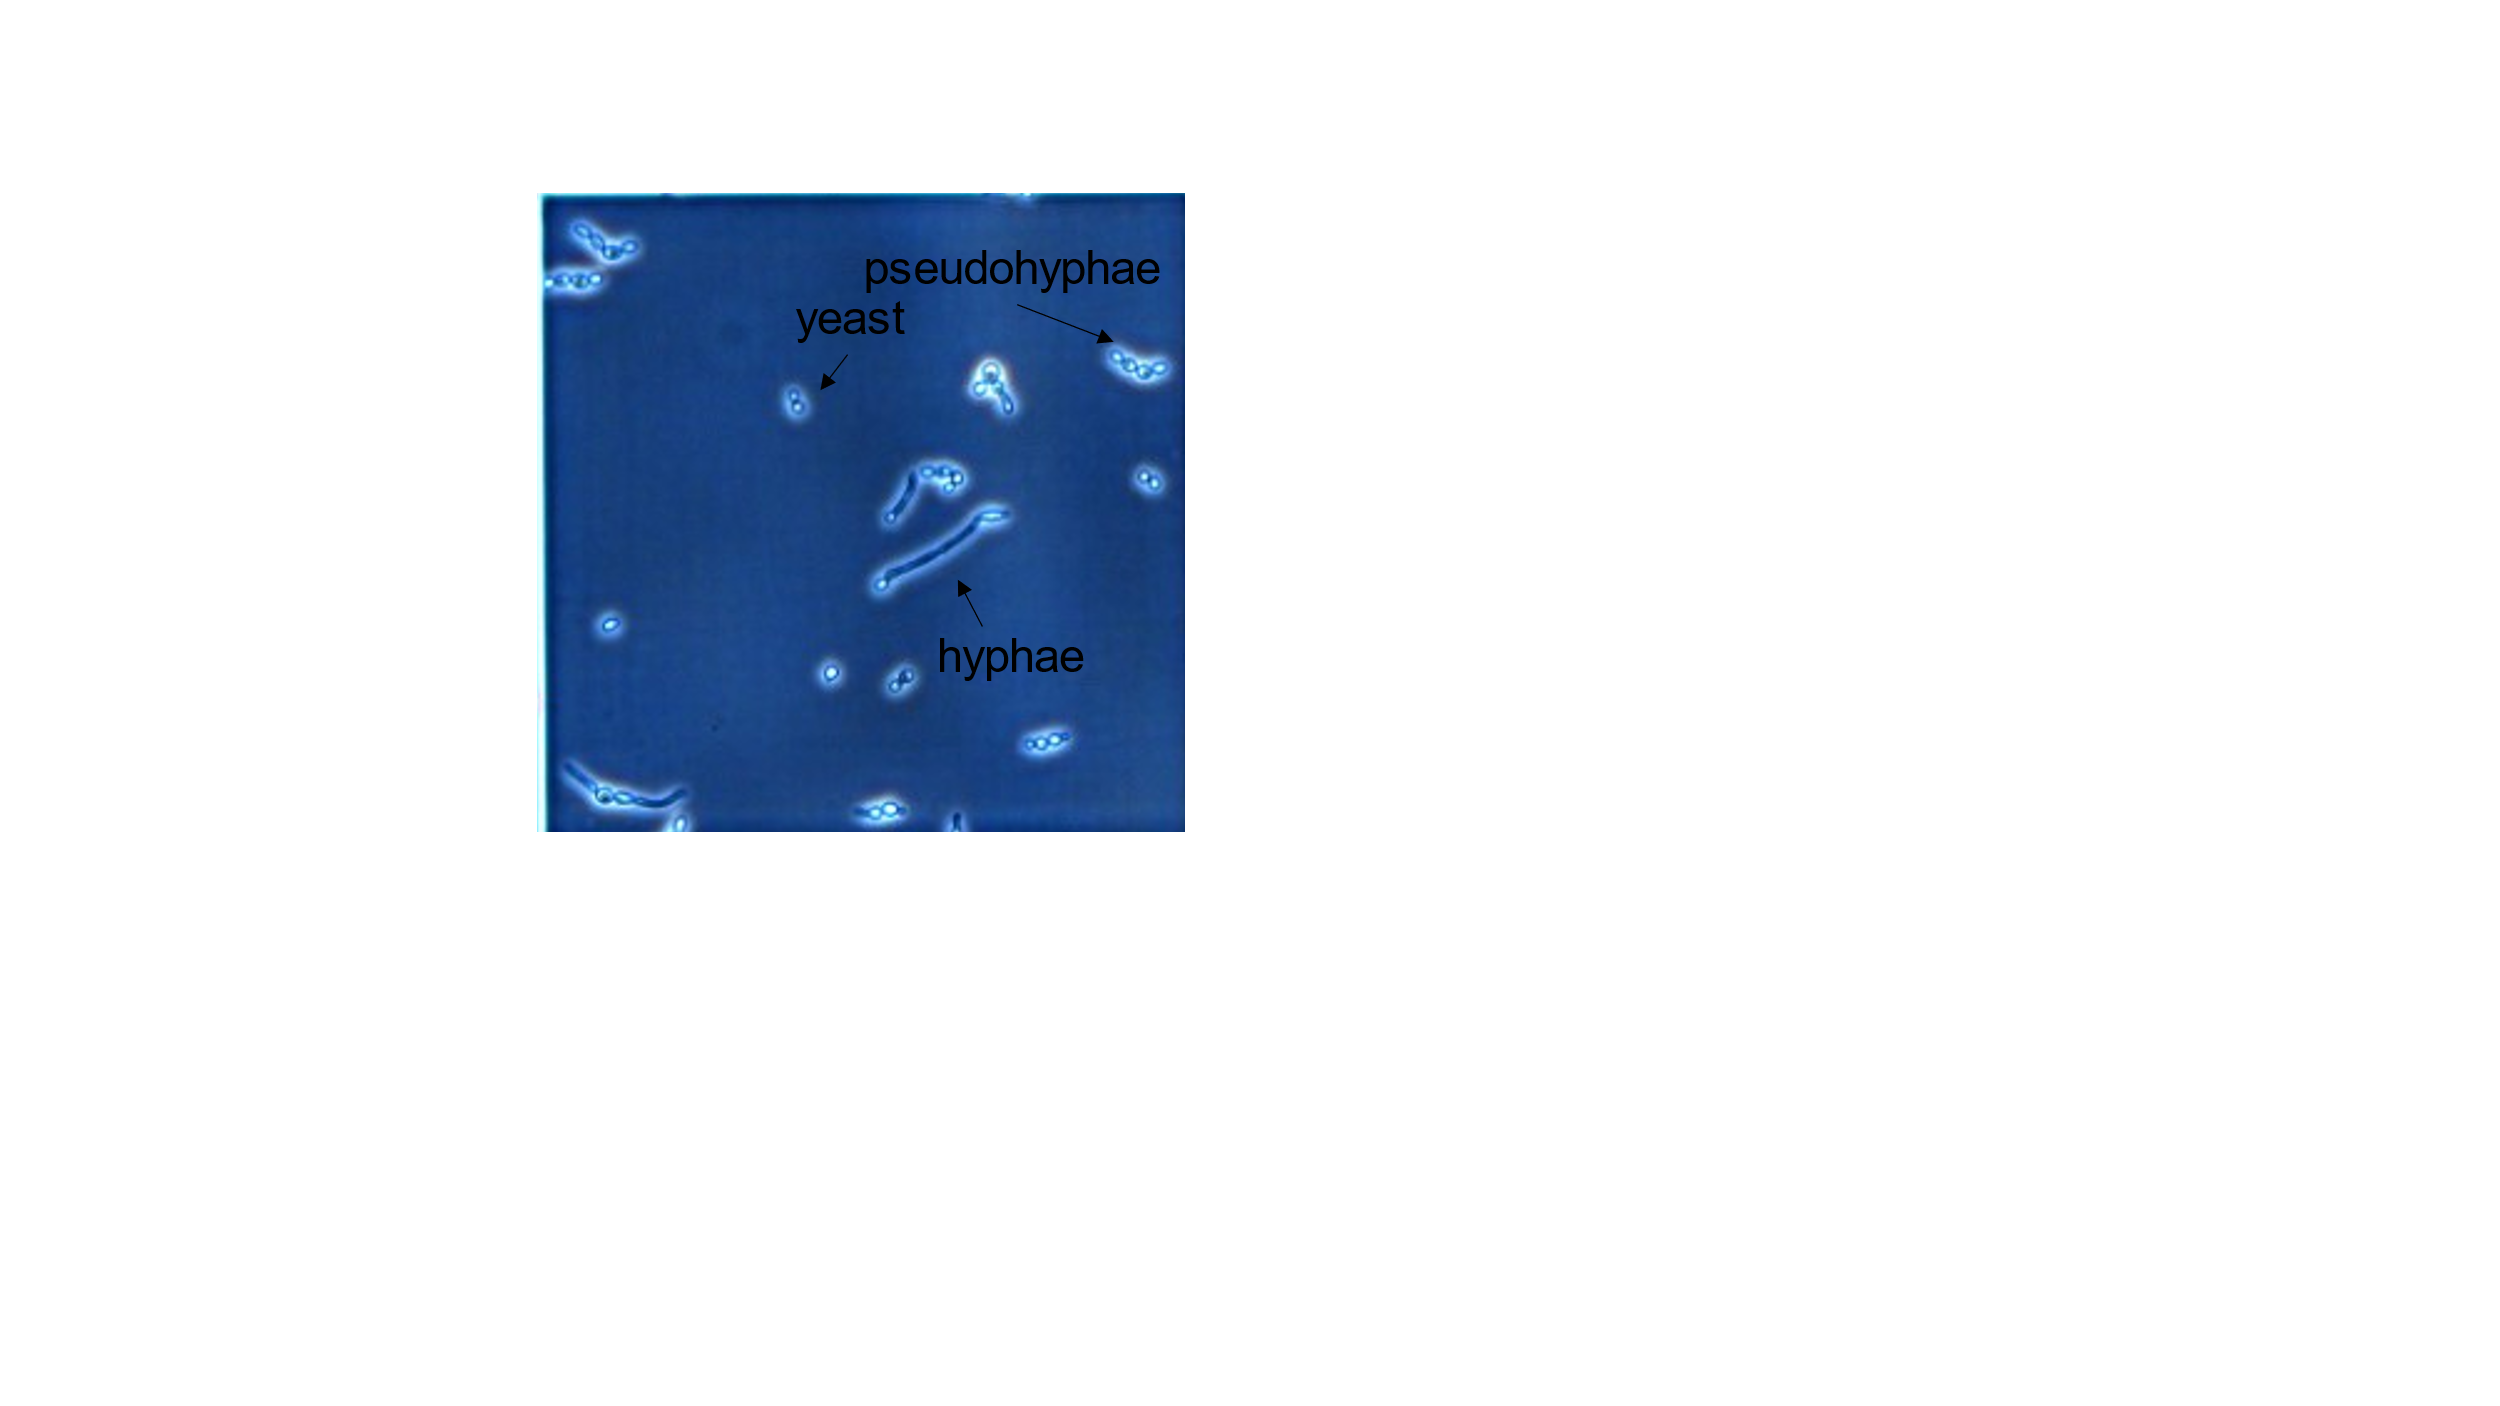


**Figure S2.** The hyphal formation observed under light microscope.

Under the light microscope, hyphae, pseudohyphal, and yeast forms were distinguished

**Table S1.** Characteristics of *Lactobacillus.*

| No. | Genus | Species | Strain denomination | Isolation date | Origin |
| --- | --- | --- | --- | --- | --- |
| 1 | *Lactobacillus* | *crispatus* | 3-1-1 | 2014/1/20 | Human vaginal discharge |
| 2 | *Lactobacillus* | *crispatus* | 3-1-2 | 2014/1/20 | Human vaginal discharge |
| 3 | *Lactobacillus* | *crispatus* | 8-1 | 2014/1/20 | Human vaginal discharge |
| 4 | *Limosilactobacillus* | *vaginalis* | 10-1 | 2014/1/20 | Human vaginal discharge |
| 5 | *Lacticaseibacillus* | *rhamnosus* | 14-1 | 2014/1/28 | Human vaginal discharge |
| 6 | *Lactobacillus* | *crispatus* | 14-2 | 2014/1/28 | Human vaginal discharge |
| 7 | *Lactobacillus* | *gasseri* | 16-2-1 | 2014/1/28 | Human vaginal discharge |
| 8 | *Lactobacillus* | *gasseri* | 16-2-2 | 2014/1/28 | Human vaginal discharge |
| 9 | *Lactobacillus* | *crispatus* | 20-2 | 2014/1/28 | Human vaginal discharge |
| 10 | *Lactobacillus* | *crispatus* | 23-1 | 2014/1/28 | Human vaginal discharge |
| 11 | *Lactobacillus* | *jensenii* | 27-1 | 2014/4/28 | Human vaginal discharge |
| 12 | *Lactobacillus* | *jensenii* | 28-3 | 2014/4/28 | Human vaginal discharge |
| 13 | *Lactobacillus* | *jensenii* | 29-1 | 2014/4/28 | Human vaginal discharge |
| 14 | *Lactobacillus* | *gasseri* | 30-1 | 2014/4/28 | Human vaginal discharge |
| 15 | *Limosilactobacillus* | *vaginalis* | 30-2 | 2014/4/28 | Human vaginal discharge |
| 16 | *Lactobacillus* | *gasseri* | 31-1 | 2014/4/28 | Human vaginal discharge |
| 17 | *Lactobacillus* | *gasseri* | 32-2 | 2014/7/28 | Human vaginal discharge |
| 18 | *Lactobacillus* | *gasseri* | 33-1 | 2014/7/28 | Human vaginal discharge |
| 19 | *Lactobacillus* | *crispatus* | 34-1-1 | 2014/7/28 | Human vaginal discharge |
| 20 | *Lactobacillus* | *crispatus* | 34-1-2 | 2014/7/28 | Human vaginal discharge |
| 21 | *Lactobacillus* | *crispatus* | 35-1 | 2014/7/28 | Human vaginal discharge |
| 22 | *Limosilactobacillus* | *vaginalis* | 41-1 | 2014/7/28 | Human vaginal discharge |
| 23 | *Lactobacillus* | *gasseri* | 45-3-1 | 2014/7/28 | Human vaginal discharge |
| 24 | *Lactobacillus* | *gasseri* | 45-3-2 | 2014/7/28 | Human vaginal discharge |
| 25 | *Lactobacillus* | *gasseri* | 49-1 | 2014/7/28 | Human vaginal discharge |
| 26 | *Lactobacillus* | *gasseri* | 52-2 | 2014/7/28 | Human vaginal discharge |
| 27 | *Lactobacillus* | *crispatus* | 53-1 | 2014/9/8 | Human vaginal discharge |

**Table S2.** Primers used in this study.

| Target | Sequence (5'-3') | Tm (°C) | Length (bp) | Reference |
| --- | --- | --- | --- | --- |
| *ECE1* | Forward: CCAGAAATTGTTGCTCGTGTTGCCA | 62 | 140 | Lee et al. [42] [42] |
| Reverse: TCCAGGACGCCATCAAAAACGTTAG | 61 |
| *HWP1* | Forward: TTGTTTGCGTCATCAAGACTTTG | 56 | 73 |
| Reverse : GTCTTCATCAGCAGTAACACAACCA | 59 |
| *YWP1* | Forward: GTTCCATTTTTCCAAGTTCATTTAG | 53 | 170 |
| Reverse : TCAAGAGTAGAACCTTCAAGAGCAG | 58 |
| *ACT1* | Forward: GTTGGTGATGAAGCCCAATC | 55 | 79 | Gunsaluset al. [43] |
| Reverse: CCCAGTTGGAAACAATACCG | 55 |
